# Supplementary material for: Microbial and geo-archaeological records reveal the growth rate, origin and composition of desert rock surface communities
Source: Copernicus journal article supplement (doi:10.5194/bg-18-3331-2021), 2021-06-04
Supplement: Supplementary file 1 [file bg-18-3331-2021-supplement.zip]

Archive with 3 entries (3 files):
- Wieler_et_al_Biogeoscience_Supp_13052021.pdf
- bg-18-3331-2021-supplement-title-page.pdf
- Table S3.xlsx
