# Supplementary material for: Microbial and geo-archaeological records reveal the growth rate, origin and composition of desert rock surface communities
Source: Copernicus journal article supplement (doi:10.5194/bg-18-3331-2021), 2021-06-04
Supplement: Supplementary file 1 [file bg-18-3331-2021-supplement.zip › bg-18-3331-2021-supplement-title-page.pdf]

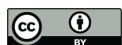

## *Supplement of*

# **Microbial and geo-archaeological records reveal the growth rate, origin and composition of desert rock surface communities**

**Nimrod Wieler et al.**

*Correspondence to:* Roey Angel ([roey.angel@bc.cas.cz](mailto:roey.angel@bc.cas.cz)) and Osnat Gillor ([gilloro@bgu.ac.il](mailto:gilloro@bgu.ac.il))

- [bg-18-3331-2021-supplement-title-page.pdf](#)
- [Table S3.xlsx](#)
- [Wieler\\_et\\_al\\_Biogeoscience\\_Supp\\_13052021.pdf](#)

The copyright of individual parts of the supplement might differ from the article licence.
