# Supplementary material for: Microbial and geo-archaeological records reveal the growth rate, origin and composition of desert rock surface communities
Source: Copernicus journal article supplement (doi:10.5194/bg-18-3331-2021), 2021-06-04
Supplement: Supplementary file 1 [file bg-18-3331-2021-supplement.zip › Wieler_et_al_Biogeoscience_Supp_13052021.pdf]

## **Supplementary figures and tables**

**Table S1.** ANOVA test results for various alpha-diversity metrics.

| <b>Observed S</b>  | <b>Sum Sq</b> | <b>Df</b> | <b>F value</b> | <b>Pr(&gt;F)</b> |     |
|--------------------|---------------|-----------|----------------|------------------|-----|
| (Intercept)        | 588166        | 1         | 198.58         | 3.60E-12         | *** |
| Location           | 3993          | 1         | 1.35           | 0.26             |     |
| Rock.type          | 7767          | 1         | 2.62           | 0.12             |     |
| Location:Rock.type | 10123         | 1         | 3.42           | 0.08             |     |
| Residuals          | 62200         | 21        |                |                  |     |
| Inv. Simpson       |               |           |                |                  |     |
| (Intercept)        | 4281315       | 1         | 1306.61        | 2E-16>           | *** |
| Location           | 4             | 1         | 0              | 0.97             |     |
| Rock.type          | 1671          | 1         | 0.51           | 0.48             |     |
| Location:Rock.type | 8756          | 1         | 2.67           | 0.12             |     |
| Residuals          | 68810         | 21        |                |                  |     |
| Shannon's H        |               |           |                |                  |     |
| (Intercept)        | 308.9         | 1         | 1353.08        | 2E-16>           | *** |
| Location           | 1.4           | 1         | 6.1            | 0.02             |     |
| Rock.type          | 0.1           | 1         | 0.36           | 0.55             |     |
| Location:Rock.type | 0.3           | 1         | 1.15           | 0.3              |     |
| Residuals          | 4.8           | 21        |                |                  |     |
| Berger Parker      |               |           |                |                  |     |
| (Intercept)        | 7346          | 1         | 145.56         | 6.60E-11         | *** |
| Location           | 543           | 1         | 10.76          | 3.60E-03         | **  |
| Rock.type          | 99            | 1         | 1.96           | 0.18             |     |
| Location:Rock.type | 117           | 1         | 2.32           | 0.14             |     |
| Residuals          | 1060          | 21        |                |                  |     |

**Table S2.** Variance partitioning of the Morisita-Horn distance matrix using PERMANOVA

| Observed S         | Df | Sums of Sqs | Mean Sqs | F Model | R2   | Pr(>F) |   |
|--------------------|----|-------------|----------|---------|------|--------|---|
| Location           | 1  | 0.63        | 0.63     | 2.12    | 0.08 | 0.02   | * |
| Rock.type          | 1  | 0.39        | 0.39     | 1.3     | 0.05 | 0.23   |   |
| Location:Rock.type | 1  | 0.49        | 0.49     | 1.63    | 0.06 | 0.1    |   |
| Residuals          | 21 | 6.25        | 0.3      | 0.81    |      |        |   |
| Total              | 24 | 7.75        | 1        |         |      |        |   |

**Table S3.** Taxonomic classification and differential-abundance test results between the samples from the archaeological site  
5 (City) and the nearby slopes (Slope). (See attached Table S3.xlsx)

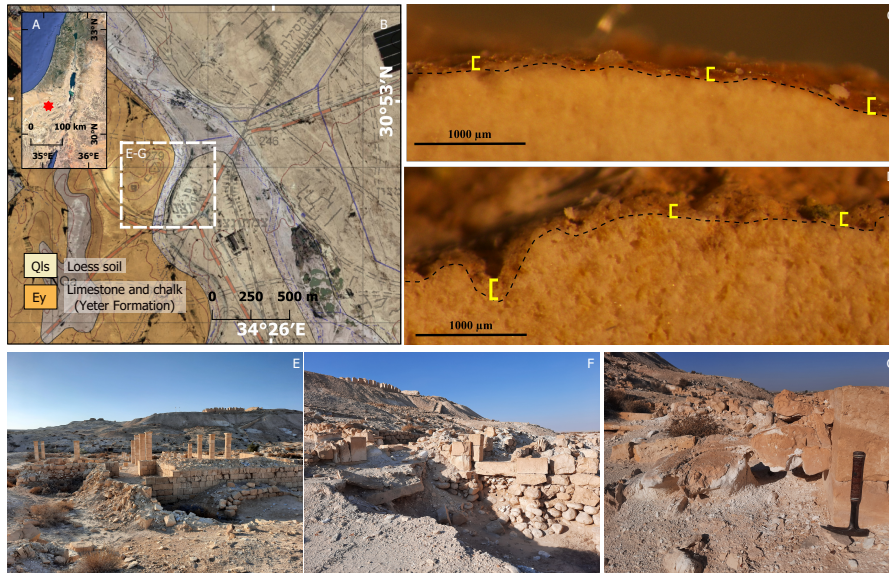

**Figure S1.** (A) Geographical location of the study area (red star) in the central Negev Desert, Israel (Google, ©2020 Landsat / Copernicus Data SIO, NOAA, U.S. Navy, NGA, GEBCO Mapa GISrael) ; (B) Nitzana geological map (?; reproduced with permission) ; (C) A panoramic view of Nitzana Byzantine city; (D, E) Buildings blocks at Nitzana site (30 cm hammer for scale); (F) BRC on chalk sample retrieved from the site, black dashed line marks the interface between BRC at the top and host rock at the bottom; (G) BRC on limestone sample retrieved from the site, black dashed line marks the interface between BRC at the top and host rock at the bottom.

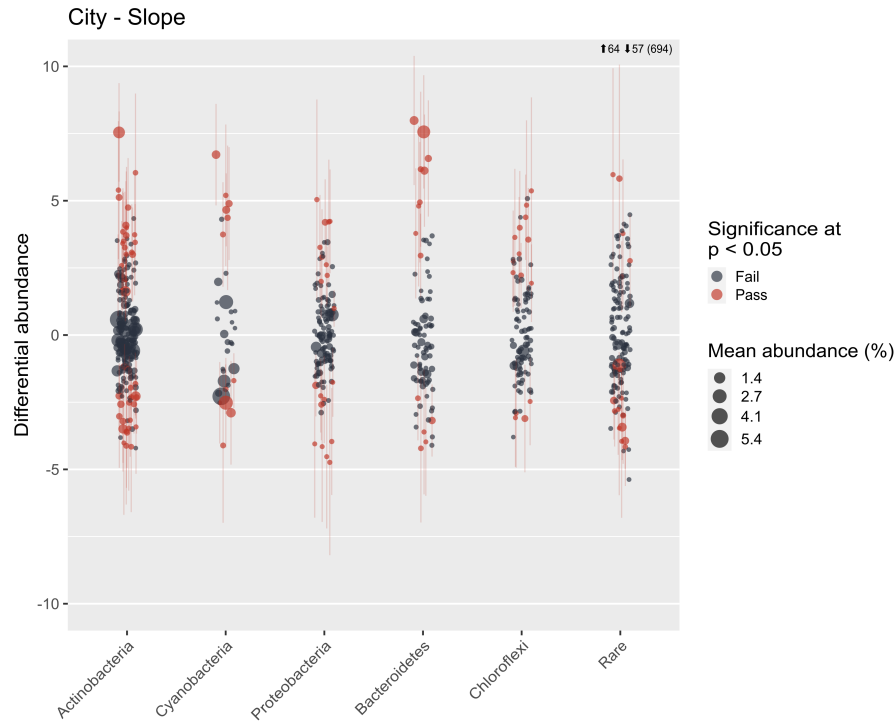

**Figure S2.** Detection of differentially abundant OTUs between the city and slope samples using a beta-binomial regression model (corncob). Each circle denotes a single OTU, and its size is its average relative abundance across all samples. The x-axis shows the classification of each OTU, whereas the y-axis denotes the difference in the modelled mean relative abundance between the city and slope samples. 'Rare' denotes all OTUs belonging to phyla that account for less than 5% of the relative abundance. Red circles are OTUs that show significant differential abundance at the  $P < 0.05$  level. Numbers next to the arrows (top right) indicate the number of significant differentially abundant OTUs that are either more abundant (up arrow) or less abundant (down arrow) in the city samples compared to the slope samples. The number in brackets indicates the total number of OTUs tested.
